# Supplementary material for: Kinetically-Defined Component Actions in Gene Repression
Source: PubMed Central journal article supplement (PMC4376387; doi:10.1371/journal.pcbi.1004122), 2015-03-27

A

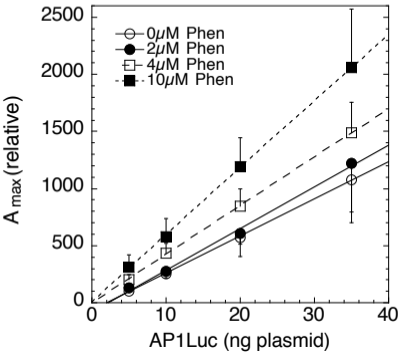

B

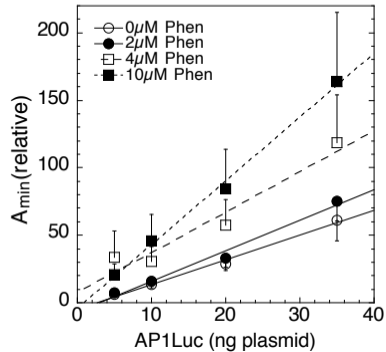

C

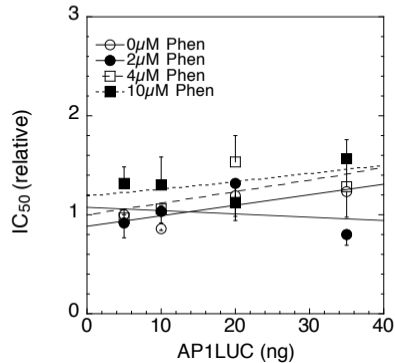

Supplement: pcbi.1004122.s002.pdf [file pcbi.1004122.s002.pdf]
